# Supplementary material
Source: publisher figshare collection journal article supplement (https://acs.figshare.com/ndownloader/files/9742513)
Supplement: Supplementary file 1 [file 9742513]

## **Supporting information**

### **Solute Rotation and Translation Dynamics in an Ionic Deep Eutectic Solvent Based on Choline Chloride**

**Sk Saddam Hossain and Anunay Samanta\***

*School of Chemistry, University of Hyderabad, Hyderabad-500 046, India*

*Email of corresponding author: [anunay@uohyd.ac.in](mailto:anunay@uohyd.ac.in)*

#### **List of contents:**

1. Fig. S1:  $^1\text{H}$ -NMR spectra of choline chloride (ChCl), ethylene glycol (EG) and ethaline.
2. Fig. S2: Fluorescence intensity time trace of ethaline alone and R123 in ethaline.
3. Fig. S3: Measured viscosities of ethaline at different temperatures along with the fits to the Vogel–Fulcher–Tamman (VFT) equation.
4. Fig. S4: Fluorescence correlation curves for the diffusion of C153, R123 and FL in ethaline fitted to single component diffusion model.
5. Fig. S5: Residuals of the fits to the fluorescence correlation curves for the three solutes for single component and anomalous diffusion models.
6. Fig. S6: Dependence of the  $\tau_r$  values of C153, R123 and FL in ethaline on  $\eta/T$  according to  $\tau_r = A(\eta/T)^P$  (shown as dashed lines). The hypothetical line with  $P=1$  is shown as solid line.
7. Table S1: Reorientation times (ns) of the three solutes for the slip and stick boundary conditions at different temperatures calculated using Stokes-Einstein-Debye (SED) hydrodynamic theory.

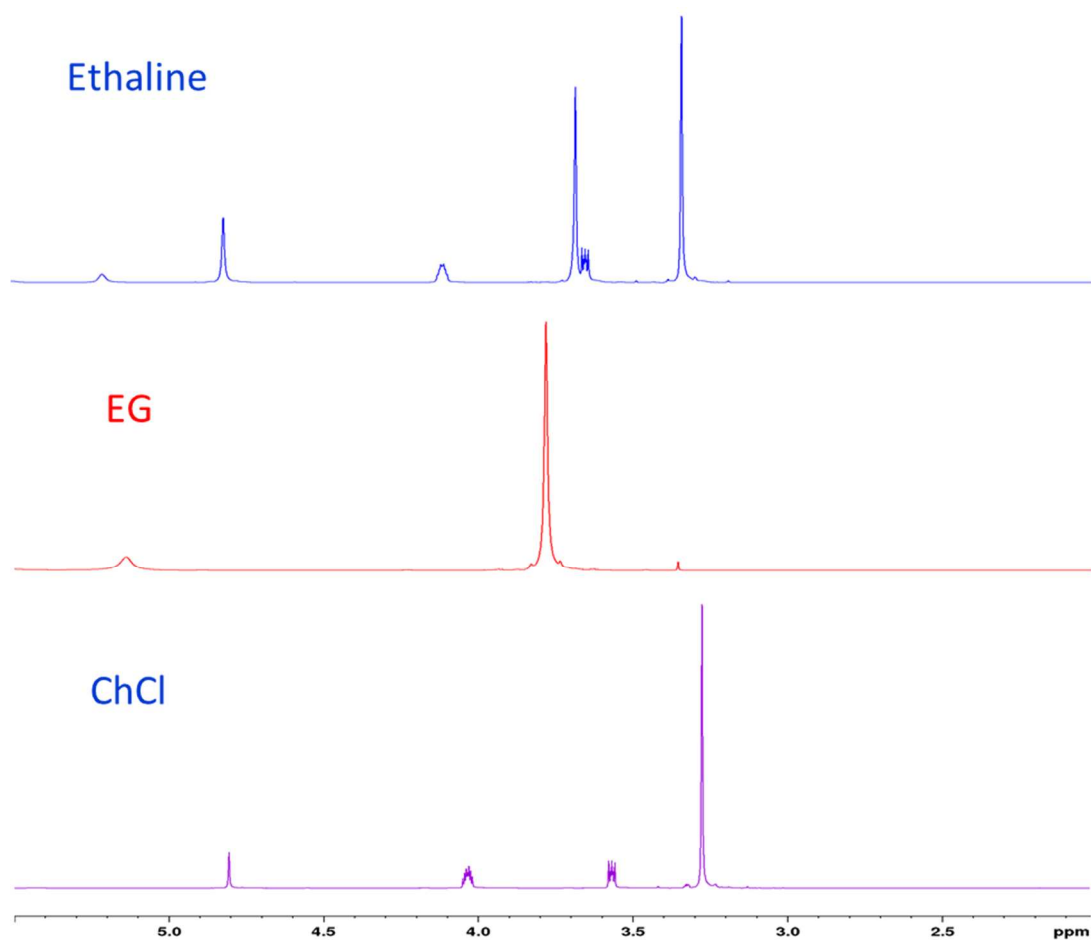

**Figure S1.**  $^1\text{H}$ -NMR spectra of choline chloride (ChCl), ethylene glycol (EG) and ethaline ( $\text{CD}_3\text{OD}$  as reference).

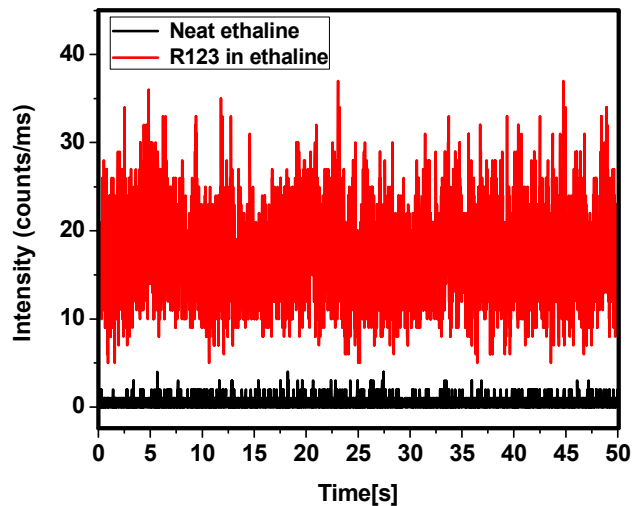

**Figure S2.** Fluorescence intensity time trace of ethaline alone and R123 in ethaline ( $\lambda_{\text{exc}} = 485$  nm).

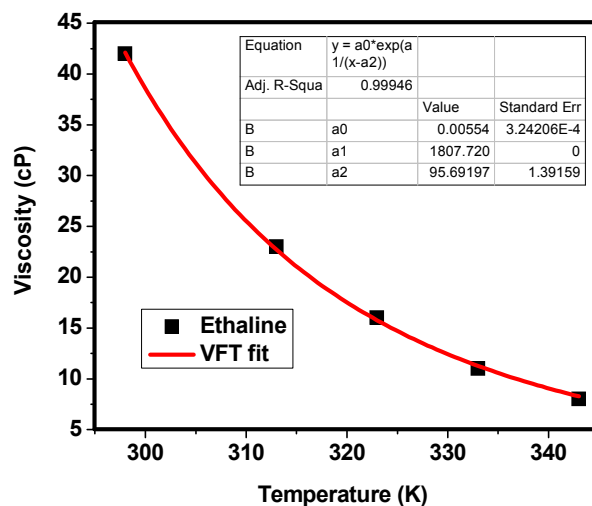

**Figure S3.** Measured viscosity (points) of ethaline at different temperatures together with the fits (solid line) according to the Vogel–Fulcher–Tamman (VFT) equation.

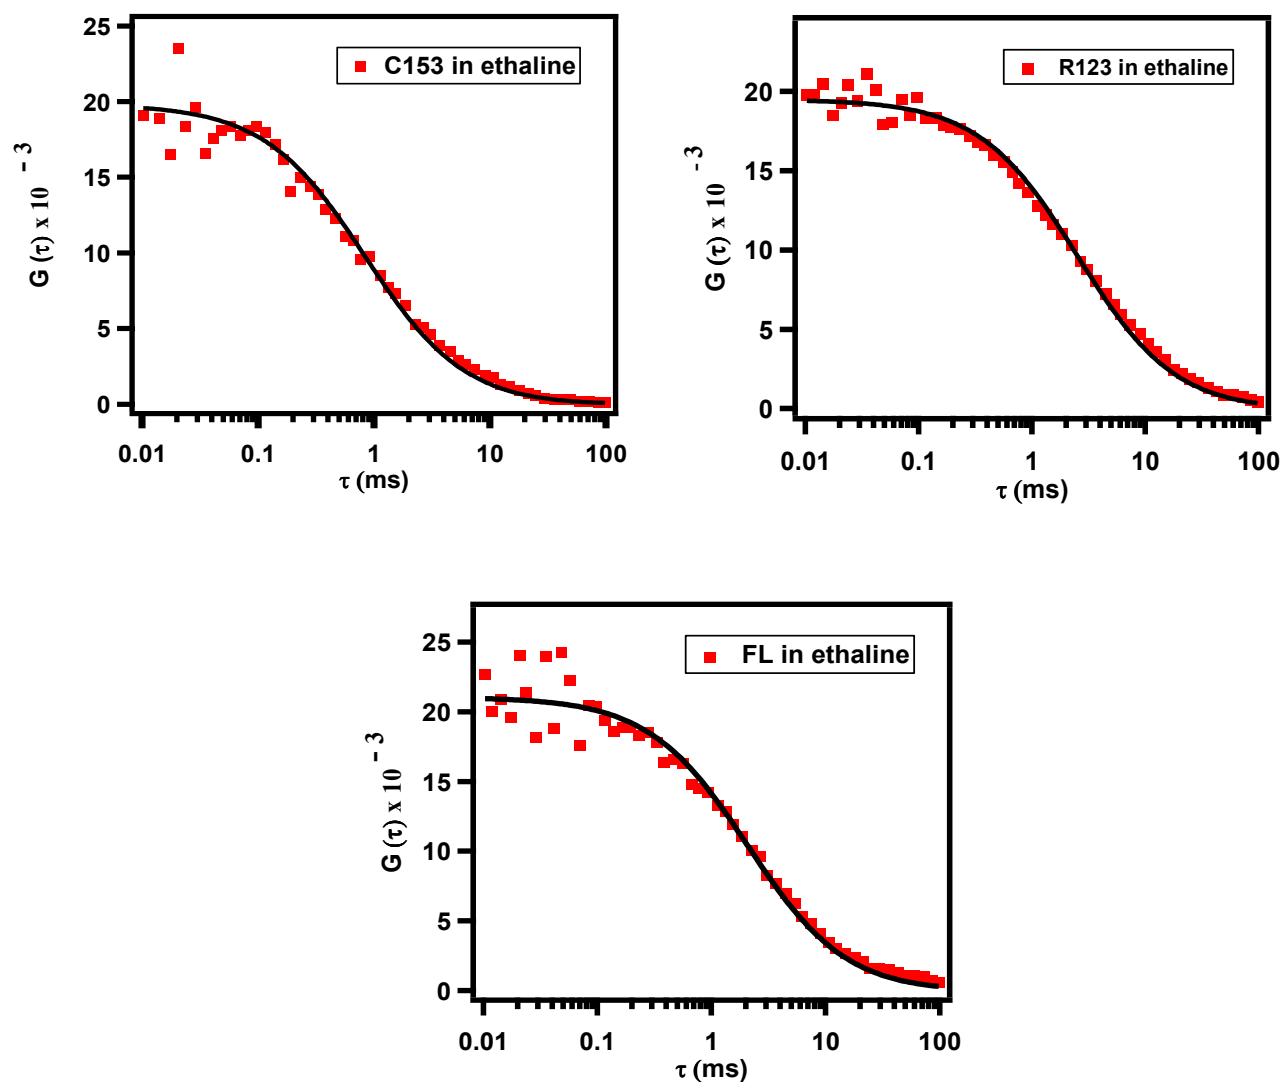

**Figure S4.** Fluorescence correlation curves for the diffusion of solutes in ethaline. The points are the experimental data and the solid lines represent fit to the data using single component diffusion model. The excitation wavelengths are 405 nm for C153 and 485 nm for R123 and FL.

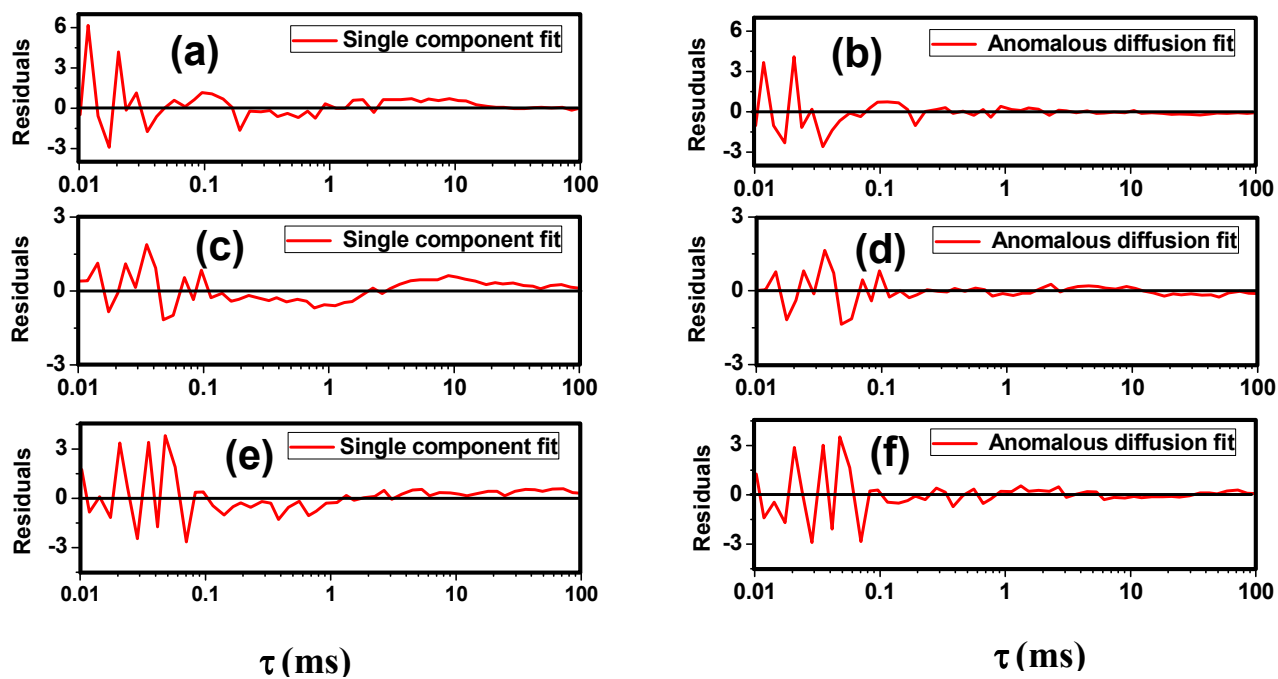

**Figure S5.** Residuals of the fits of fluorescence correlation curve for C153 (a, b), R123 (c, d), and FL (e, f) for the single component and anomalous diffusion models.

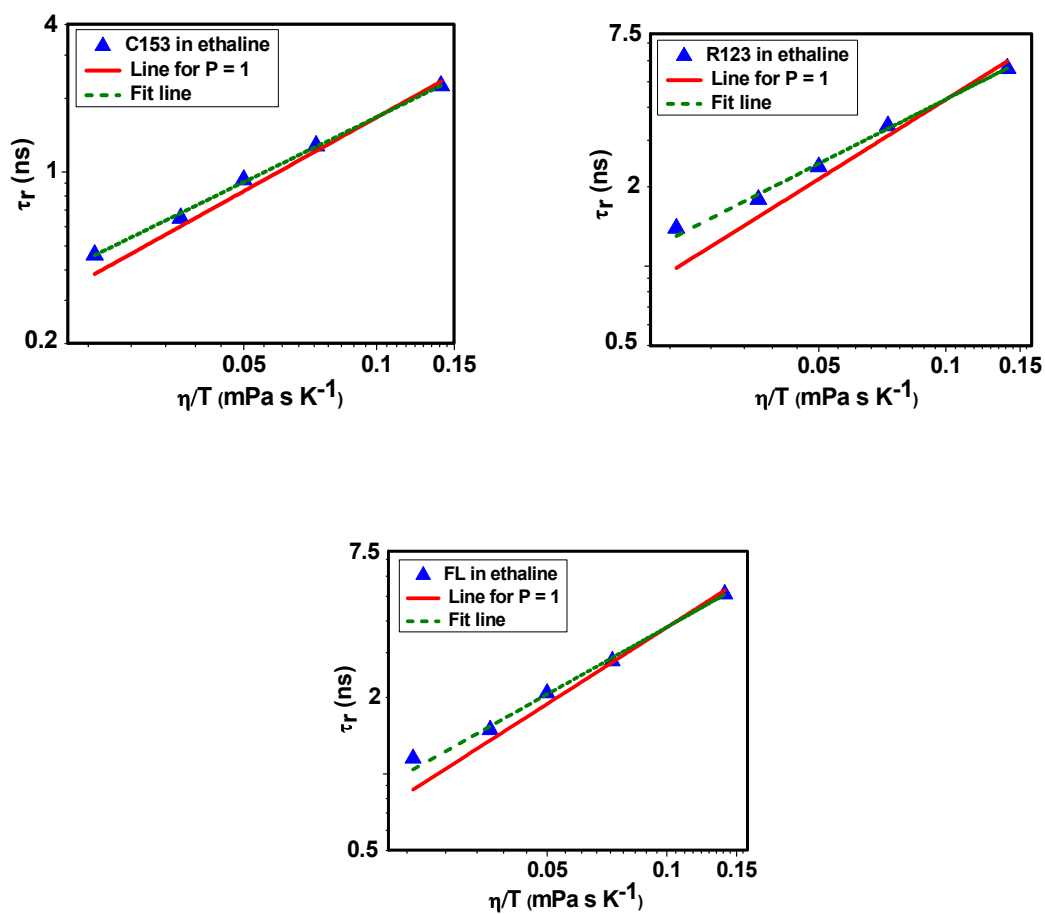

Fig. S6: Dependence of the  $\tau_r$  values of C153, R123 and FL in ethaline on  $\eta/T$  according to  $\tau_r = A(\eta/T)^P$  shown as dashed lines. The hypothetical line with  $P=1$  is shown as solid line.

**Table S1.** Reorientation times (ns) of the solutes for slip and stick boundary conditions at different temperatures calculated using Stokes-Einstein-Debye (SED) hydrodynamic theory.

| Temp (K) | C153 |       | R123 |       | FL   |       |
|----------|------|-------|------|-------|------|-------|
|          | Slip | Stick | Slip | Stick | Skip | Stick |
| 298      | 1.03 | 4.29  | 0.96 | 6.20  | 0.74 | 5.26  |
| 313      | 0.54 | 2.24  | 0.50 | 3.23  | 0.38 | 2.74  |
| 323      | 0.36 | 1.51  | 0.34 | 2.18  | 0.26 | 1.87  |
| 333      | 0.26 | 1.10  | 0.25 | 1.58  | 0.19 | 1.36  |
| 343      | 0.17 | 0.71  | 0.16 | 1.03  | 0.12 | 0.88  |
